# Supplementary material for: Evolutionary Variability of W-Linked Repetitive Content in Lacertid Lizards
Source: MDPI journal article supplement (doi:10.3390/genes11050531), 2020-05-11
Supplement: s1 [file s1]

Supplementary Materials.

Table S1. List of individuals per species and sex analyzed in this study.

| Species                           | No of specimens |   |
|-----------------------------------|-----------------|---|
|                                   | ♂               | ♀ |
| <i>Acanthodactylus schreiberi</i> | -               | 1 |
| <i>Eremias arguta</i>             | -               | 1 |
| <i>Gallotia galloti</i>           | 1               | 2 |
| <i>Gastropholis prasina</i>       | 2               | 3 |
| <i>Lacerta bilineata</i>          | -               | 1 |
| <i>Lacerta media</i>              | -               | 1 |
| <i>Lacerta strigata</i>           | -               | 1 |
| <i>Lacerta trilineata</i>         | 2               | 1 |
| <i>Latastia longicaudata</i>      | -               | 1 |
| <i>Phoenicolacerta troodica</i>   | -               | 1 |
| <i>Podarcis siculus</i>           | -               | 1 |
| <i>Takydromus dorsalis</i>        | 1               | 1 |
| <i>Takydromus sexlineatus</i>     | 1               | 1 |
| <i>Timon lepidus</i>              | 2               | 2 |
| <i>Timon tangitanus</i>           | 1               | 1 |

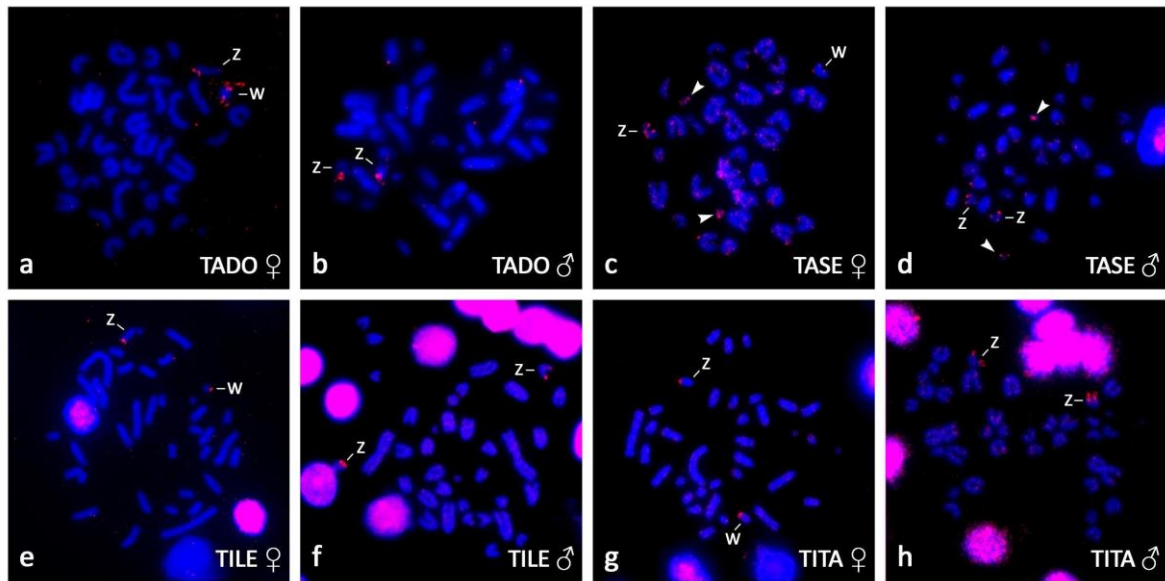

**Figure S1.** Mitotic metaphase chromosomes hybridized with the  $(GATA)_8$  probe in (a) female and (b) male of *Takydromus dorsalis* (TADO), (c) female and (d) male of *Takydromus sexlineatus* (TASE), (e) female and (f) male of *Timon lepidus* (TILE), (g) female and (h) male of *Timon tangitanus* (TITA). Chromosomes were counterstained with DAPI (blue), the hybridization probes were detected with fluorescein-avidin D (red). The Z and W chromosomes are indicated, microchromosomes in *Takydromus sexlineatus* with additional signals are pointed with white arrows.
